# Supplementary material for: Black Sigatoka in bananas: Ecoclimatic suitability and disease pressure assessments
Source: PubMed Central journal article supplement (PMC6693783; doi:10.1371/journal.pone.0220601), 2019-08-14

**Figure S1.** Map showing the source of the location records used in the analysis. Red are the expert database records, blue are those geo-coded from the literature, and green are the validation records.

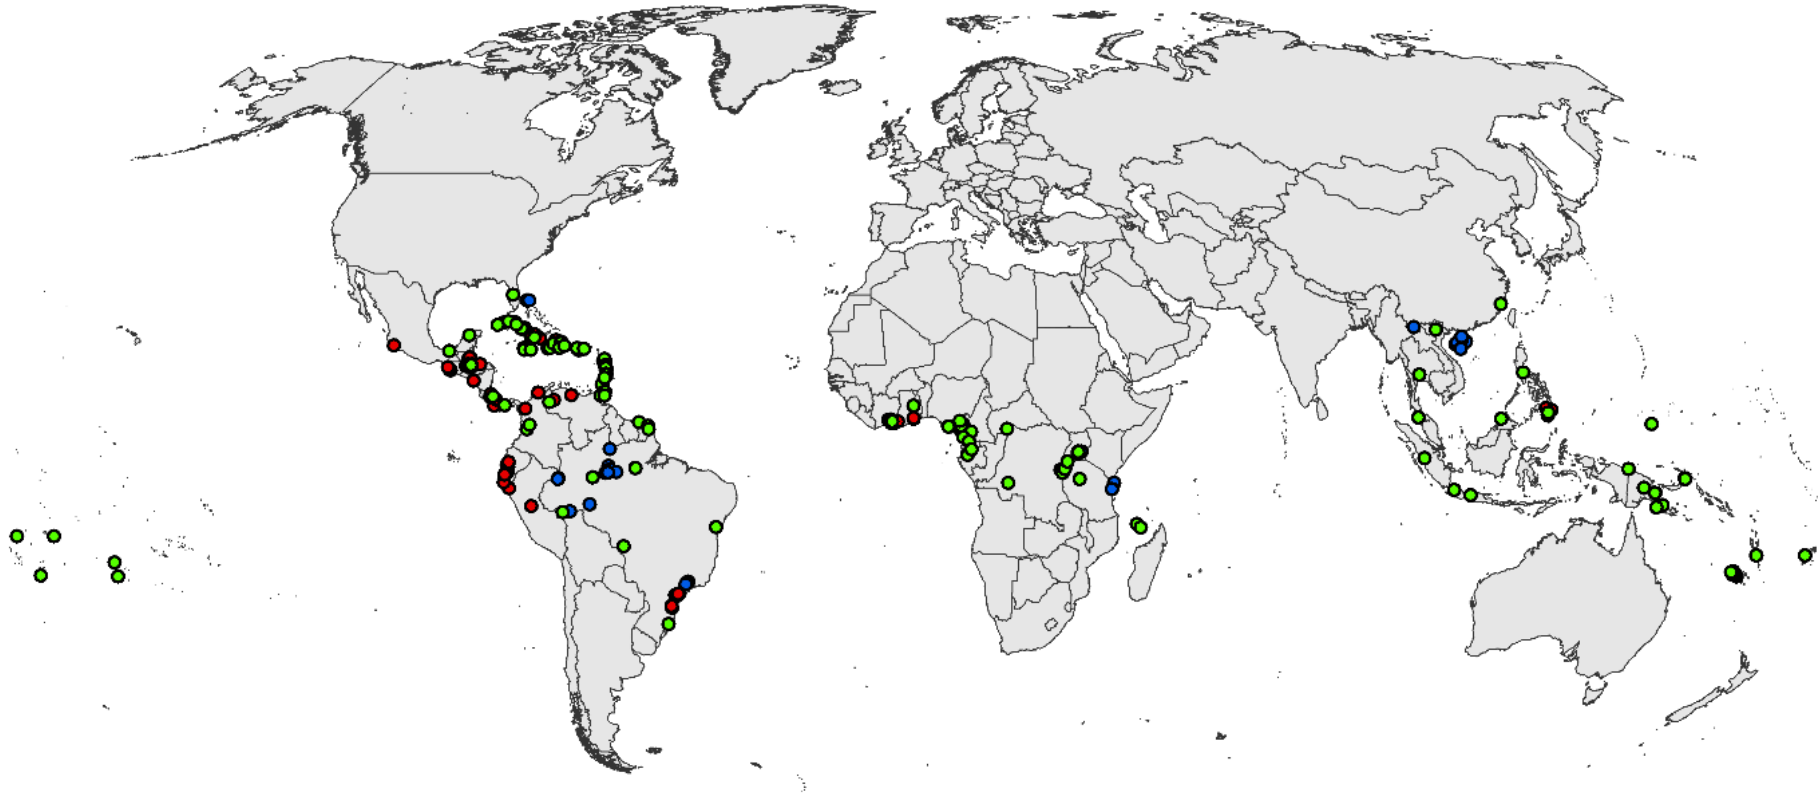

Supplement: pone.0220601.s001.pdf [file pone.0220601.s001.pdf]
