# Supplementary material for: Black Sigatoka in bananas: Ecoclimatic suitability and disease pressure assessments
Source: PubMed Central journal article supplement (PMC6693783; doi:10.1371/journal.pone.0220601), 2019-08-14
Supplement: pone.0220601.s011.pdf [file pone.0220601.s011.pdf]

**Fig S11.** Growth chart for *P. fijiensis* at expert database site #80 in Nicaragua. Model was run with 5mm day<sup>-1</sup> irrigation added as top-up.

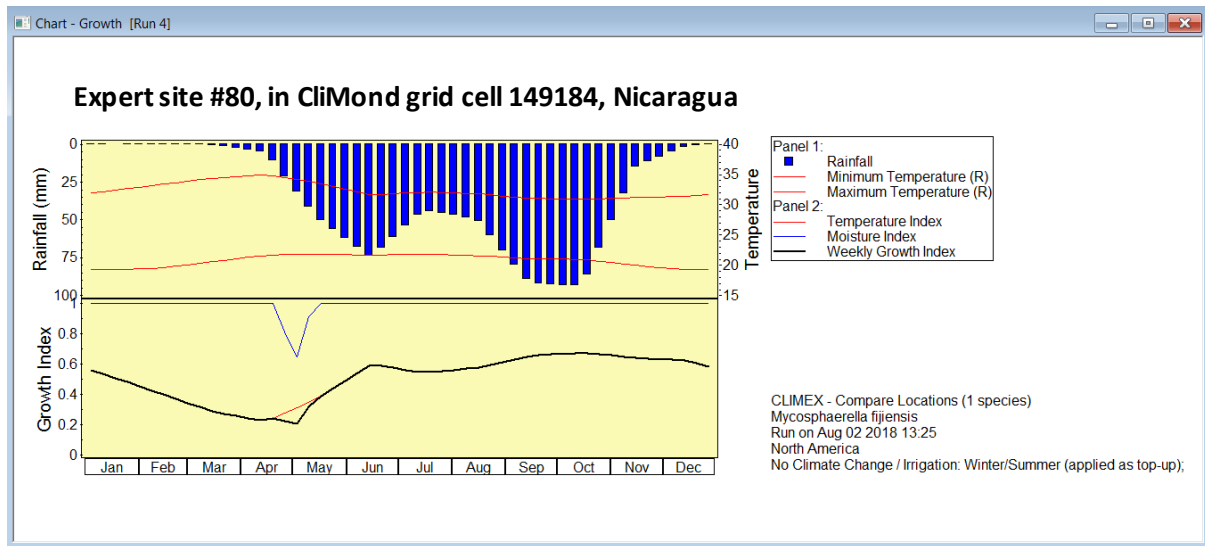

Bananas and plantains are amongst the main crops grown with irrigation in Nicaragua[1]. Growth of *P. fijiensis* at this expert database site is primarily temperature-limited, with only a few weeks of moisture restriction on growth.

1. FAO. AQUASTAT Website: Food and Agriculture Organization of the United Nations (FAO); 2016 [13 September 2016]. Available from: [http://www.fao.org/nr/water/aquastat/countries\\_regions/](http://www.fao.org/nr/water/aquastat/countries_regions/).
