# Supplementary material for: Black Sigatoka in bananas: Ecoclimatic suitability and disease pressure assessments
Source: PubMed Central journal article supplement (PMC6693783; doi:10.1371/journal.pone.0220601), 2019-08-14

**Fig S16.** Soil moisture values of the CLIMEX grid cells containing the ten highest-ranked locations (lines with markers) and the five lowest-ranked locations (solid lines, no markers) of *P. fijiensis*. For each location, grid cell number, country, disease pressure ranking, and EI value without irrigation (and with irrigation in brackets) are given.

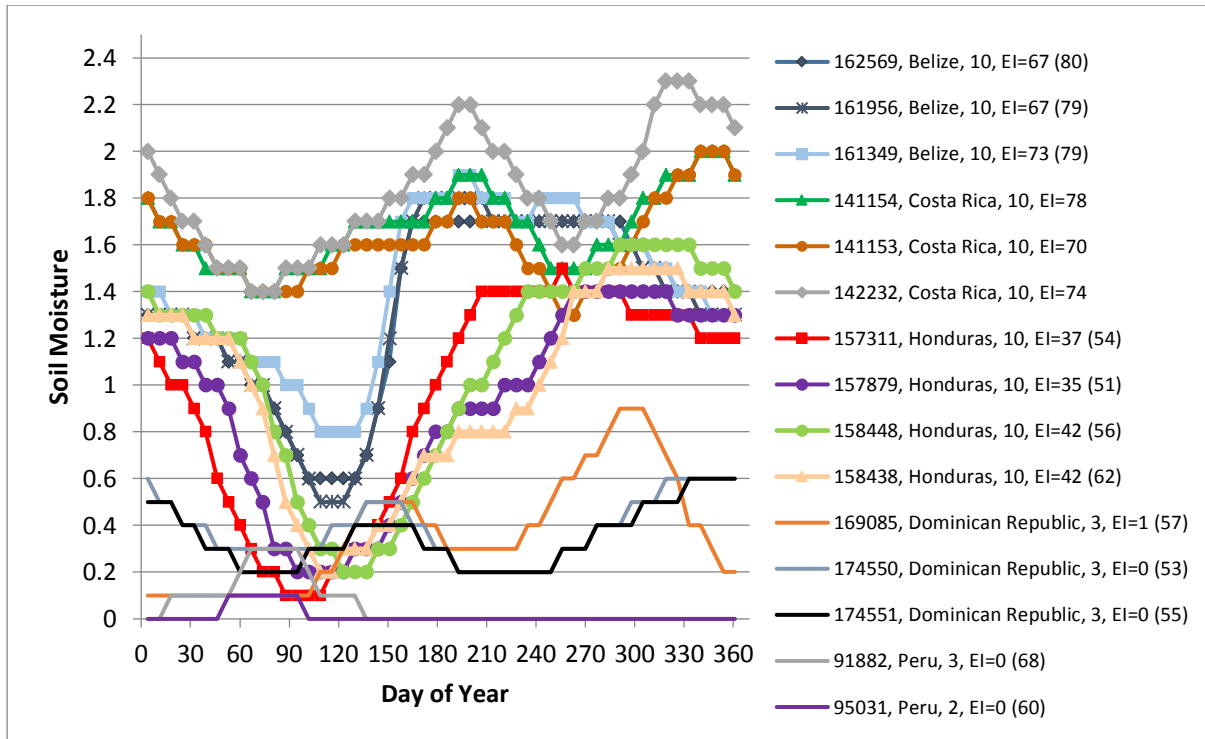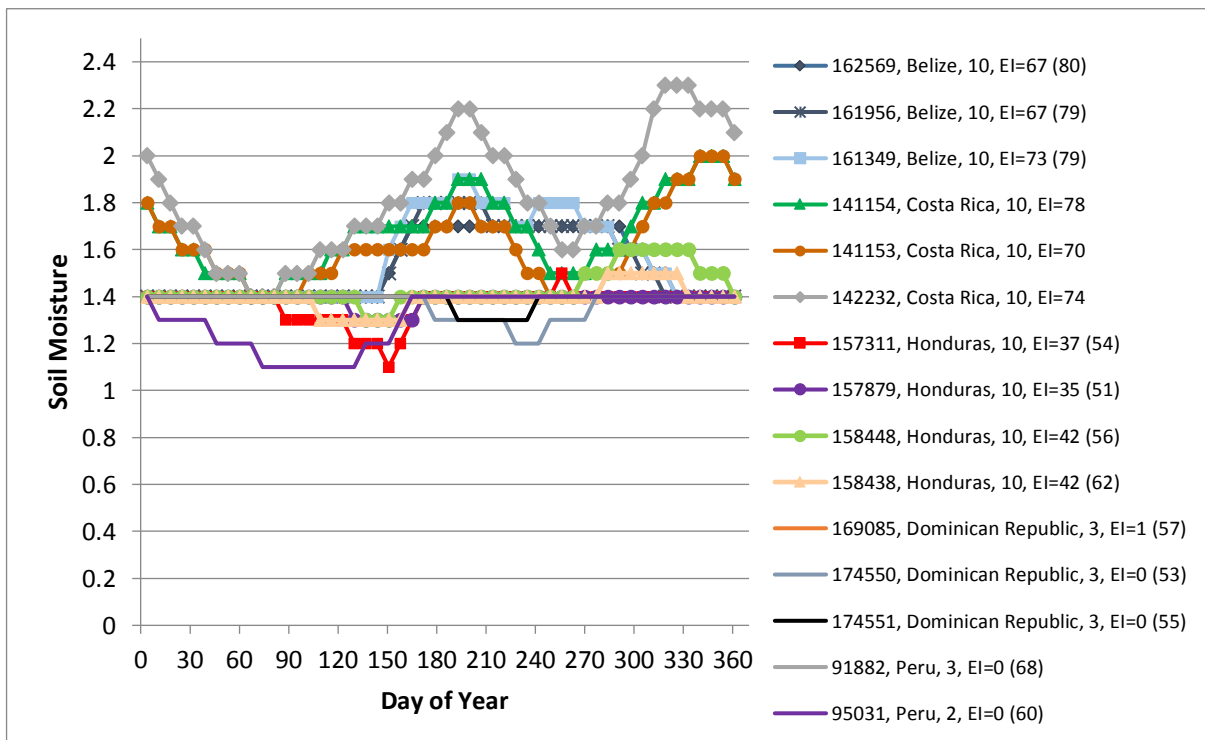

Supplement: pone.0220601.s016.pdf [file pone.0220601.s016.pdf]
