# Supplementary material for: Black Sigatoka in bananas: Ecoclimatic suitability and disease pressure assessments
Source: PubMed Central journal article supplement (PMC6693783; doi:10.1371/journal.pone.0220601), 2019-08-14
Supplement: pone.0220601.s017.pdf [file pone.0220601.s017.pdf]

**Table S1.** Water requirements for optimal banana production.

| Source                                                                                                                                                                                                                                                                                                            | Weekly water requirement (mm)                                                                                                                                                            | Annual rainfall for rainfed production (mm) |
|-------------------------------------------------------------------------------------------------------------------------------------------------------------------------------------------------------------------------------------------------------------------------------------------------------------------|------------------------------------------------------------------------------------------------------------------------------------------------------------------------------------------|---------------------------------------------|
| Anon. (1)                                                                                                                                                                                                                                                                                                         | 50 – 100                                                                                                                                                                                 |                                             |
| Diczbalis (2), for Darwin and Katherine, Australia                                                                                                                                                                                                                                                                | 39 – 66                                                                                                                                                                                  |                                             |
| <a href="https://www.daf.qld.gov.au/plants/fruit-and-vegetables/fruit-and-nuts/bananas/frequently-asked-questions-about-bananas/irrigating">https://www.daf.qld.gov.au/plants/fruit-and-vegetables/fruit-and-nuts/bananas/frequently-asked-questions-about-bananas/irrigating</a>                                 | 20 – 60                                                                                                                                                                                  |                                             |
| <a href="http://www.fao.org/nr/water/cropinfo_banana.html">http://www.fao.org/nr/water/cropinfo_banana.html</a>                                                                                                                                                                                                   | [equivalent to 38 – 48]                                                                                                                                                                  | 2 000 – 2 500                               |
| <a href="http://www.memoireonline.com/02/11/4268/Design-of-a-geographic-information-supported-database-for-the-management-of-pressurised-irrigation-s.html">http://www.memoireonline.com/02/11/4268/Design-of-a-geographic-information-supported-database-for-the-management-of-pressurised-irrigation-s.html</a> | 30-40                                                                                                                                                                                    | 1 500-2 000                                 |
| <a href="https://www.agric.wa.gov.au/bananas/banana-irrigation-and-soil-water-management-oria">https://www.agric.wa.gov.au/bananas/banana-irrigation-and-soil-water-management-oria</a>                                                                                                                           | growers applied 55 - 85 mm H <sub>2</sub> O / hectare / week in summer, and 30 - 60mm in winter. The range in annual application of irrigation water in the ORIA is about 17 to 26ML/ha. |                                             |

1. Anon. The Biology of *Musa* L. (banana). Australia: Department of Health and Ageing, 2008 2008. Report No.
2. Diczbalis Y. Irrigation management of bananas in the Top End 1993 20 September 2016:[1-7 pp.]. Available from: [https://dpif.nt.gov.au/\\_data/assets/pdf\\_file/0009/233766/567.pdf](https://dpif.nt.gov.au/_data/assets/pdf_file/0009/233766/567.pdf).
