# Supplementary material for: Black Sigatoka in bananas: Ecoclimatic suitability and disease pressure assessments
Source: PLoS One. 2019 Aug 14;14(8):e0220601. doi: 10.1371/journal.pone.0220601 (PMC6693783; doi:10.1371/journal.pone.0220601)
Supplement: S1 File — (XLSX) [file pone.0220601.s018.xlsx]

## Sheet: expert_scores
ID	CODE	COUNTRY	ADM_1	ADM_2	ADM_3	NAME	CHARACTERISTICS	LONGITUDE	LATITUDE	BLS PRESENCE	Expert1	Expert2	Expert3	Expert4	Expert5	Expert6	Expert7	Expert8	Expert9	Expert10	DP_MAX	DP_MIN	DP_AVG	DP_AVG_noExpert1	W_AVG	Grid Cell #
1	BLZ	BELIZE	Toledo	NA	NA	Belize 17	NA	-88.6352	16.465	Yes	10	NA	NA	NA	NA	NA	NA	NA	NA	NA	10	10	10	NA	10	161349
2	BLZ	BELIZE	Toledo	NA	NA	Belize 11	NA	-88.6386	16.4882	Yes	10	NA	NA	NA	NA	NA	NA	NA	NA	NA	10	10	10	NA	10	161349
3	BLZ	BELIZE	Toledo	NA	NA	Belize 6	NA	-88.6505	16.5136	Yes	10	NA	NA	NA	NA	NA	NA	NA	NA	NA	10	10	10	NA	10	161349/161956
4	BLZ	BELIZE	Toledo	NA	NA	Belize 13	NA	-88.558	16.5168	Yes	10	NA	NA	NA	NA	NA	NA	NA	NA	NA	10	10	10	NA	10	161349/161956
5	BLZ	BELIZE	Toledo	NA	NA	Belize 18	NA	-88.5618	16.5236	Yes	10	NA	NA	NA	NA	NA	NA	NA	NA	NA	10	10	10	NA	10	161956
6	BLZ	BELIZE	Toledo	NA	NA	Belize 4	NA	-88.5465	16.5288	Yes	10	NA	NA	NA	NA	NA	NA	NA	NA	NA	10	10	10	NA	10	161956
7	BLZ	BELIZE	Toledo	NA	NA	Belize 3	NA	-88.5295	16.5475	Yes	10	NA	NA	NA	NA	NA	NA	NA	NA	NA	10	10	10	NA	10	161956
8	BLZ	BELIZE	Toledo	NA	NA	Belize 2	NA	-88.5445	16.5478	Yes	10	NA	NA	NA	NA	NA	NA	NA	NA	NA	10	10	10	NA	10	161956
9	BLZ	BELIZE	Toledo	NA	NA	Belize 1	NA	-88.5279	16.5673	Yes	10	NA	NA	NA	NA	NA	NA	NA	NA	NA	10	10	10	NA	10	161956
10	BLZ	BELIZE	Toledo	NA	NA	Belize 14	NA	-88.5563	16.5744	Yes	10	NA	NA	NA	NA	NA	NA	NA	NA	NA	10	10	10	NA	10	161956
11	BLZ	BELIZE	Toledo	NA	NA	Belize 12	NA	-88.5768	16.5805	Yes	10	NA	NA	NA	NA	NA	NA	NA	NA	NA	10	10	10	NA	10	161956
12	BLZ	BELIZE	Toledo	NA	NA	Belize 21	NA	-88.5686	16.5926	Yes	10	NA	NA	NA	NA	NA	NA	NA	NA	NA	10	10	10	NA	10	161956
13	BLZ	BELIZE	Stann Creek	NA	NA	Belize 7	NA	-88.3354	16.7033	Yes	10	NA	NA	NA	NA	NA	NA	NA	NA	NA	10	10	10	NA	10	162569
14	BLZ	BELIZE	Stann Creek	NA	NA	Belize 16	NA	-88.3472	16.7037	Yes	10	NA	NA	NA	NA	NA	NA	NA	NA	NA	10	10	10	NA	10	162569
15	BLZ	BELIZE	Stann Creek	NA	NA	Belize 8	NA	-88.3561	16.7095	Yes	10	NA	NA	NA	NA	NA	NA	NA	NA	NA	10	10	10	NA	10	162569
16	BLZ	BELIZE	Stann Creek	NA	NA	Belize 15	NA	-88.3295	16.7133	Yes	10	NA	NA	NA	NA	NA	NA	NA	NA	NA	10	10	10	NA	10	162569
17	BLZ	BELIZE	Stann Creek	NA	NA	Belize 26	NA	-88.4015	16.7143	Yes	10	NA	NA	NA	NA	NA	NA	NA	NA	NA	10	10	10	NA	10	162569
18	BLZ	BELIZE	Stann Creek	NA	NA	Belize 5	NA	-88.4165	16.7256	Yes	10	NA	NA	NA	NA	NA	NA	NA	NA	NA	10	10	10	NA	10	162569
19	BRA	BRAZIL	Santa Catarina	Luiz Alves	Luiz Alves	Brazil - Luiz Alvez	Small producers	-48.9511	-26.7388	Yes	7	NA	NA	NA	NA	NA	NA	NA	NA	2	7	2	4.5	2	6	29181
20	BRA	BRAZIL	Santa Catarina	Guaramirim	Guaramirim	Brazil - Santa Catarina	NA	-49.0156	-26.4668	Yes	6.5	NA	NA	NA	NA	NA	NA	NA	NA	2	6.5	2	4.25	2	5.6	31039/31038
21	BRA	BRAZIL	Sâo Paulo	Miracatu	Miracatu	Valle da Ribeira - Brazi	NA	-47.4479	-24.3053	Yes	7	NA	NA	NA	NA	NA	NA	NA	NA	2	7	2	4.5	2	6	36602
22	CIV	CÔTE D'IVOIRE	Lagunes	Abidjan	Alepe	Cote d'Ivoire - SBM	NA	-3.64157	5.32364	Yes	6.5	NA	NA	NA	NA	NA	NA	NA	NA	NA	6.5	6.5	6.5	NA	6.5	125237
23	CIV	CÔTE D'IVOIRE	Lagunes	Abidjan	Dabou	Cote d'Ivoire - SCB Niek	NA	-4.3033	5.35483	Yes	6.5	NA	NA	NA	NA	NA	NA	NA	NA	NA	6.5	6.5	6.5	NA	6.5	125762
24	CIV	CÔTE D'IVOIRE	Lagunes	Abidjan	Dabou	Cote d'Ivoire - Chiquit2	NA	-4.30186	5.38845	Yes	6.5	NA	NA	NA	NA	NA	NA	NA	NA	NA	6.5	6.5	6.5	NA	6.5	125762
25	CIV	CÔTE D'IVOIRE	Lagunes	Abidjan	Dabou	Cote d'Ivoire - Le Niek1	NA	-4.2782	5.41163	Yes	6.5	NA	NA	NA	NA	NA	NA	NA	NA	NA	6.5	6.5	6.5	NA	6.5		not in shapefile, or combined with 24
26	CIV	CÔTE D'IVOIRE	Agnéby	Agboville	Azaguie	Cote d'Ivoire - SA Eglin	NA	-4.06793	5.60819	Yes	6.5	NA	NA	NA	NA	NA	NA	NA	NA	NA	6.5	6.5	6.5	NA	6.5	126275
27	CIV	CÔTE D'IVOIRE	Sud-Comoé	Aboisso	Mafere	Cote d'Ivoire - SA KJ Gr	NA	-3.0005	5.65079	Yes																	No rankings available here - just presence data
28	CIV	CÔTE D'IVOIRE	Lagunes	Tiassalé	Tiassale	Cote d'Ivoire - SCB tia	NA	-4.85204	5.88738	Yes	5	NA	NA	NA	NA	NA	NA	NA	NA	NA	5	5	5	NA	5	127296
29	CIV	CÔTE D'IVOIRE	Lagunes	Tiassalé	Tiassale	Cote d'Ivoire - Chiquit2	NA	-4.80365	5.90135	Yes	5	NA	NA	NA	NA	NA	NA	NA	NA	NA	5	5	5	NA	5	127295
30	CIV	CÔTE D'IVOIRE	Agnéby	Agboville	Agboville	Cote d'Ivoire - Gr SIPEF	NA	-4.34203	5.94108	Yes	5	NA	NA	NA	NA	NA	NA	NA	NA	NA	5	5	5	NA	5	127293
31	CMR	CAMEROON	Littoral	Moungo	NA	Cameroun - Del Mon Tiko1	NA	9.41095	4.15222	Yes	8.5	NA	NA	NA	NA	NA	NA	NA	NA	NA	8.5	8.5	8.5	NA	8.5	121886
32	CMR	CAMEROON	Littoral	Moungo	NA	Cameroun - Del Mon Tiko	NA	9.40518	4.15601	Yes	8.5	NA	NA	NA	NA	NA	NA	NA	NA	NA	8.5	8.5	8.5	NA	8.5	121886
33	CMR	CAMEROON	Littoral	Moungo	NA	Cameroun - Del Mon Ekona	NA	9.40372	4.25325	Yes	8	NA	NA	NA	NA	NA	NA	NA	NA	NA	8	8	8	NA	8	122337
34	CMR	CAMEROON	Littoral	Moungo	NA	Cameroun - PHP2	NA	9.64745	4.56383	Yes	8.5	NA	NA	NA	NA	NA	NA	NA	NA	NA	8.5	8.5	8.5	NA	8.5	123272
35	CMR	CAMEROON	Littoral	Moungo	NA	Cameroun - PHP1	NA	9.65191	4.59609	Yes	8.5	NA	NA	NA	NA	NA	NA	NA	NA	NA	8.5	8.5	8.5	NA	8.5	123272
36	CMR	CAMEROON	Littoral	Moungo	NA	Cameroun - Penja PHP	NA	9.64241	4.61733	Yes	8.5	NA	NA	NA	NA	NA	NA	NA	NA	NA	8.5	8.5	8.5	NA	8.5	123272
37	CMR	CAMEROON	Littoral	Moungo	NA	Cameroun - PHP3	NA	9.71218	4.63763	Yes	8.5	NA	NA	NA	NA	NA	NA	NA	NA	NA	8.5	8.5	8.5	NA	8.5	123273
38	CMR	CAMEROON	Littoral	Moungo	NA	Cameroun - PHP4	NA	9.70615	4.71469	Yes	8.5	NA	NA	NA	NA	NA	NA	NA	NA	NA	8.5	8.5	8.5	NA	8.5	123750
39	COL	COLOMBIA	Antioquia	Apartadó	NA	Colombia - Uraba	Differences according to zones	-76.6675	7.88669	Yes	8	NA	NA	NA	NA	6	NA	NA	NA	NA	8	6	7	6	7.6	134026
40	COL	COLOMBIA	Magdalena	Ciénaga	NA	Colombia - Santa Marta	Differences according to zones	-74.2385	10.6942	Yes	7	NA	NA	NA	NA	4.5	NA	NA	NA	NA	7	4.5	5.75	4.5	6.5	143287
41	CRI	COSTA RICA	Limón	Limón	NA	Costa Rica 4	NA	-82.9921	9.6884	Yes	8	8.5	NA	NA	NA	7	7	8	NA	NA	8.5	7	7.7	7.625	7.925	140083/140082
42	CRI	COSTA RICA	Limón	Matina	NA	Costa Rica 2	NA	-83.2536	10.032	Yes	10	9.5	NA	NA	NA	9	8	NA	NA	NA	10	8	9.125	8.83333	9.76667	141153
43	CRI	COSTA RICA	Limón	Siquirres	NA	Costa Rica 1	NA	-83.4516	10.1374	Yes	10	9.5	NA	NA	NA	8	9	9	NA	NA	10	8	9.1	8.875	9.775	141154
44	CRI	COSTA RICA	Limón	Pococí	NA	Costa Rica 3	NA	-83.6355	10.4114	Yes	10	9.5	NA	NA	NA	9	10	10	NA	NA	10	9	9.7	9.625	9.925	142232
45	CUB	CUBA	Guantánamo	NA	NA	San Antonio, Cuba	NA	-74.8186	20.0557	Yes	6.5	NA	NA	NA	NA	NA	NA	NA	NA	NA	6.5	6.5	6.5	NA	6.5	175929
46	CUB	CUBA	Granma	NA	NA	Bayamo, Cuba	NA	-76.6905	20.3655	Yes	6.5	NA	NA	NA	NA	NA	NA	NA	NA	NA	6.5	6.5	6.5	NA	6.5	171331
47	CUB	CUBA	Holguín	NA	NA	Guara, Cuba	NA	-75.8464	20.6761	Yes	6.5	NA	NA	NA	NA	NA	NA	NA	NA	NA	6.5	6.5	6.5	NA	6.5	178733
48	CUB	CUBA	Holguín	NA	NA	Holguin, Cuba	NA	-75.9163	20.7593	Yes	6.5	NA	NA	NA	NA	NA	NA	NA	NA	NA	6.5	6.5	6.5	NA	6.5	178733
49	CUB	CUBA	Ciego de Ávila	NA	NA	La Cuba, Cuba	NA	-78.5734	21.7908	Yes	6.5	NA	NA	NA	NA	NA	NA	NA	NA	NA	6.5	6.5	6.5	NA	6.5	183171
50	CUB	CUBA	La Habana	NA	NA	Alquizar, Cuba	NA	-82.5682	22.7763	Yes	6.5	NA	NA	NA	NA	NA	NA	NA	NA	NA	6.5	6.5	6.5	NA	6.5	187890
51	CUB	CUBA	Villa Clara	NA	NA	Sagua, Cuba	NA	-80.185	22.8975	Yes	6.5	NA	NA	NA	NA	NA	NA	NA	NA	NA	6.5	6.5	6.5	NA	6.5	188673
52	DOM	DOMINICAN REPUBLIC	Azua	NA	NA	RD - Azua Finca 6	NA	-70.7418	18.4165	Yes	3	NA	NA	NA	NA	NA	NA	NA	NA	NA	3	3	3	NA	3	169085
53	DOM	DOMINICAN REPUBLIC	Azua	NA	NA	RD - Azua Hor Organicos	NA	-70.8106	18.4546	Yes	3	NA	NA	NA	NA	NA	NA	NA	NA	NA	3	3	3	NA	3	169085
54	DOM	DOMINICAN REPUBLIC	Santiago	NA	NA	RD - Mao3	NA	-70.8833	19.5421	Yes	4	NA	NA	NA	NA	NA	NA	NA	NA	NA	4	4	4	NA	4	173865
55	DOM	DOMINICAN REPUBLIC	Valverde	NA	NA	RD - Banelino Amina	NA	-70.9888	19.5444	Yes	4	NA	NA	NA	NA	NA	NA	NA	NA	NA	4	4	4	NA	4	173866/173865
56	DOM	DOMINICAN REPUBLIC	Valverde	NA	NA	RD - Mao1	NA	-70.9967	19.5591	Yes	4	NA	NA	NA	NA	NA	NA	NA	NA	NA	4	4	4	NA	4	173866/173865
57	DOM	DOMINICAN REPUBLIC	Valverde	NA	NA	RD - Mao Norte	NA	-71.1261	19.6201	Yes	4	NA	NA	NA	NA	NA	NA	NA	NA	NA	4	4	4	NA	4	173866
58	DOM	DOMINICAN REPUBLIC	Monte Cristi	NA	NA	RD - Villa Vasquez1	NA	-71.493	19.7259	Yes	3	NA	NA	NA	NA	NA	NA	NA	NA	NA	3	3	3	NA	3	174551/174550
59	DOM	DOMINICAN REPUBLIC	Monte Cristi	NA	NA	RD - Villa Vasquez2	NA	-71.4682	19.7271	Yes	3	NA	NA	NA	NA	NA	NA	NA	NA	NA	3	3	3	NA	3	174550
60	DOM	DOMINICAN REPUBLIC	Monte Cristi	NA	NA	RD - Banelino JulianaJar	NA	-71.6043	19.7918	Yes	3	NA	NA	NA	NA	NA	NA	NA	NA	NA	3	3	3	NA	3	174551
61	ECU	ECUADOR	El Oro	Machala	Machala	Ecuador - Machala	Both small and large producers	-79.9327	-3.26188	Yes	6	NA	NA	NA	NA	5	NA	NA	NA	NA	6	5	5.5	5	5.8	100429
62	ECU	ECUADOR	Guayas	Daule	Daule	Ecuador - Guayas	Big Producers	-80.0336	-1.82652	Yes	9	NA	NA	NA	NA	4	NA	NA	NA	NA	9	4	6.5	4	8	104871
63	ECU	ECUADOR	Los Rios	Palenque	Palenque	Ecuador - Los Rios	Both small and large producers	-79.6852	-1.38131	Yes	9	NA	NA	NA	NA	4	NA	NA	NA	NA	9	4	6.5	4	8	106478
64	GHA	GHANA	Volta	North Tongu	NA	Ghana - Dole	NA	0.167045	6.09056	Yes	6	NA	NA	NA	NA	NA	NA	NA	NA	NA	6	6	6	NA	6	127738
65	GHA	GHANA	Eastern	Asuogyaman	NA	Ghana - VREL1	Volta River State Limited Banana	0.0845583	6.25506	Yes	6	NA	NA	NA	NA	NA	NA	NA	NA	NA	6	6	6	NA	6	128235
66	GHA	GHANA	Eastern	Asuogyaman	NA	Ghana - VREL2	Volta River State Limited Banana	0.0900424	6.26862	Yes	6	NA	NA	NA	NA	NA	NA	NA	NA	NA	6	6	6	NA	6	128235
67	GRD	GRENADA	Saint Patrick	NA	NA	Grenada Lac Antoine Ba	NA	-61.6143	12.184	Yes	7.5	NA	NA	NA	NA	NA	NA	NA	NA	NA	7.5	7.5	7.5	NA	7.5	147181
68	GTM	GUATEMALA	Quezaltenango	Génova	NA	Seccion Pacaya - Guatema	NA	-91.928	14.5493	Yes	NA	7	6.5	NA	NA	NA	NA	NA	NA	NA	7	6.5	6.75	6.75	6.75	155068
69	GTM	GUATEMALA	San Marcos	Ayutla	NA	Limones - Guatemala	NA	-92.1596	14.6295	Yes	NA	7	6.5	NA	NA	NA	NA	NA	NA	NA	7	6.5	6.75	6.75	6.75	155069
70	GTM	GUATEMALA	Izabal	Los Amates	NA	Guatemala 3	NA	-89.0127	15.2722	Yes	NA																No rankings available here - just presence data
71	GTM	GUATEMALA	Izabal	Morales	NA	Guatemala 2	NA	-88.9028	15.3644	Yes	NA																No rankings available here - just presence data
72	GTM	GUATEMALA	Izabal	Morales	NA	Guatemala 1	NA	-88.5812	15.5557	Yes	NA	8.5	8	NA	NA	NA	NA	NA	NA	NA	8.5	8	8.25	8.25	8.25	158453
73	HND	HONDURAS	Yoro	El Progreso	NA	Honduras Chiquita Santa	NA	-87.8861	15.217	Yes	10	8	6	9	NA	NA	NA	NA	NA	NA	10	6	8.25	7.66667	9.53333	157311
74	HND	HONDURAS	Cortés	La Lima	NA	Honduras1	NA	-87.8526	15.4525	Yes	10	8	6	9	NA	7	NA	NA	NA	NA	10	6	8	7.5	9.5	157879
75	HND	HONDURAS	Cortés	La Lima	NA	Valle de Sula - Honduras	NA	-87.8418	15.4574	Yes	10	8	6	9	7	7	NA	NA	NA	NA	10	6	7.83333	7.4	9.48		not in shapefile
76	HND	HONDURAS	Yoro	El Negrito	NA	Honduras2	NA	-87.6951	15.5752	Yes	10	8	6.5	9	10	NA	NA	NA	NA	NA	10	6.5	8.7	8.375	9.675	158448
77	HND	HONDURAS	Colón	Sonaguera	NA	Honduras - Bajo Aguan	NA	-86.1517	15.6048	Yes	10	7	5	7	10	7	NA	NA	NA	NA	10	5	7.66667	7.2	9.44	158438
78	MEX	MEXICO	Chiapas	Huixtla	NA	Soconusco - Chiapas	Large Producers	-92.507	15.0698	Yes	9	7	7	NA	NA	NA	NA	NA	NA	NA	9	7	7.66667	7	8.6	156766/156765
79	MEX	MEXICO	Colima	Tecomán	NA	Mexico - Colima	NA	-103.909	18.8463	Yes	5	NA	NA	NA	NA	NA	NA	NA	NA	NA	5	5	5	NA	5	171288
80	NIC	NICARAGUA	Chinandega	El Viejo	NA	El Viejo - Nicaragua	NA	-87.1665	12.7076	Yes	6	NA	NA	NA	NA	NA	NA	NA	NA	NA	6	6	6	NA	6	149184
81	PAN	PANAMA	Chiriquí	Bar·	NA	Baru - Panama	NA	-82.8112	8.36993	Yes	7	8.5	8.5	NA	NA	NA	NA	NA	9	NA	9	7	8.25	8.66667	7.33333	135724
82	PAN	PANAMA	Bocas del Toro	Changuinola	NA	Changuinola - Panama	NA	-82.5344	9.43439	Yes	8	8.5	8.5	NA	NA	NA	NA	NA	9	NA	9	8	8.5	8.66667	8.13333	139023
83	PAN	PANAMA	Bocas del Toro	Changuinola	NA	Costa Rica 5	NA	-82.6636	9.49572	Yes	7	8.5	NA	NA	NA	8	7	7	NA	NA	8.5	7	7.5	7.625	7.125	139023
84	PER	PERU	Ucayali	Padre Abad	Padre Abad	Peru - Aguaytia Platano	NA	-75.5132	-9.05615	Yes	8	NA	NA	NA	NA	NA	NA	NA	NA	NA	8	8	8	NA	8	81970/81969
85	PER	PERU	Lambayeque	Lambayeque	Olmos	Peru - Olmos	NA	-79.7439	-5.99296	Yes	NA																No rankings available here - just presence data
86	PER	PERU	Piura	Sullana	Marcavelica	Peru - Suliana	NA	-80.7447	-4.85812	Yes	3	NA	NA	NA	NA	1	NA	NA	NA	NA	3	1	2	1	2.6	91882
87	PER	PERU	Tumbes	Tumbes	Corrales	Peru - Tumbes	NA	-80.5045	-3.57862	Yes	2	NA	NA	NA	NA	1	NA	NA	NA	NA	2	1	1.5	1	1.8	95031
88	PHL	PHILIPPINES	Davao Del Sur	Hagonoy	Leling	Philippines - Cotabato S	NA	125.362	6.69285	Yes	NA	NA	NA	8	NA	NA	NA	NA	NA	NA	8	8	8	8	8	130312
89	PHL	PHILIPPINES	Davao Del Sur	Davao City	Malagos	Philippines - Calinan Ar	NA	125.42	7.17727	Yes	NA	NA	NA	7	NA	NA	NA	NA	NA	NA	7	7	7	7	7	131883
90	PHL	PHILIPPINES	Davao Del Sur	Davao City	Dalagdag	Philippines - Davao S	NA	125.499	7.21685	Yes	NA	NA	NA	7	NA	NA	NA	NA	NA	NA	7	7	7	7	7	131884
91	PHL	PHILIPPINES	Compostela Valley	Compostela	Osmena	Philippines - Davao NE	NA	126.103	7.65501	Yes	NA	NA	NA	8	NA	NA	NA	NA	NA	NA	8	8	8	8	8	132969
92	PHL	PHILIPPINES	Bukidnon	Valencia	Bagontaas	Philippines - Bukidnon	NA	125.091	7.95143	Yes	NA	NA	NA	6	NA	NA	NA	NA	NA	NA	6	6	6	6	6	134067
93	PRI	PUERTO RICO	Yauco	NA	NA	Puerto Rico Banana 1	NA	-66.8375	18.014	Yes	3.5	NA	NA	NA	NA	NA	NA	NA	NA	NA	3.5	3.5	3.5	NA	3.5	167677/167003
94	VEN	VENEZUELA	Trujillo	Monte Carmelo	NA	Trujillo - Venezuela	NA	-71.0186	9.39724	Yes	7	NA	NA	NA	NA	NA	NA	NA	NA	NA	7	7	7	NA	7	138986/138985
95	VEN	VENEZUELA	Carabobo	Lago de Valencia	NA	Cuenca Lago de Valencia	NA	-67.5766	10.1661	Yes	6	NA	NA	NA	NA	NA	NA	NA	NA	NA	6	6	6	NA	6	141108
