# Supplementary material for: Black Sigatoka in bananas: Ecoclimatic suitability and disease pressure assessments
Source: PLoS One. 2019 Aug 14;14(8):e0220601. doi: 10.1371/journal.pone.0220601 (PMC6693783; doi:10.1371/journal.pone.0220601)
Supplement: S8 Fig — (PDF) [file pone.0220601.s008.pdf]

**Fig S8.** Modelled climate suitability under a natural rainfall scenario of Central America and the Caribbean for *P. fijiensis*.

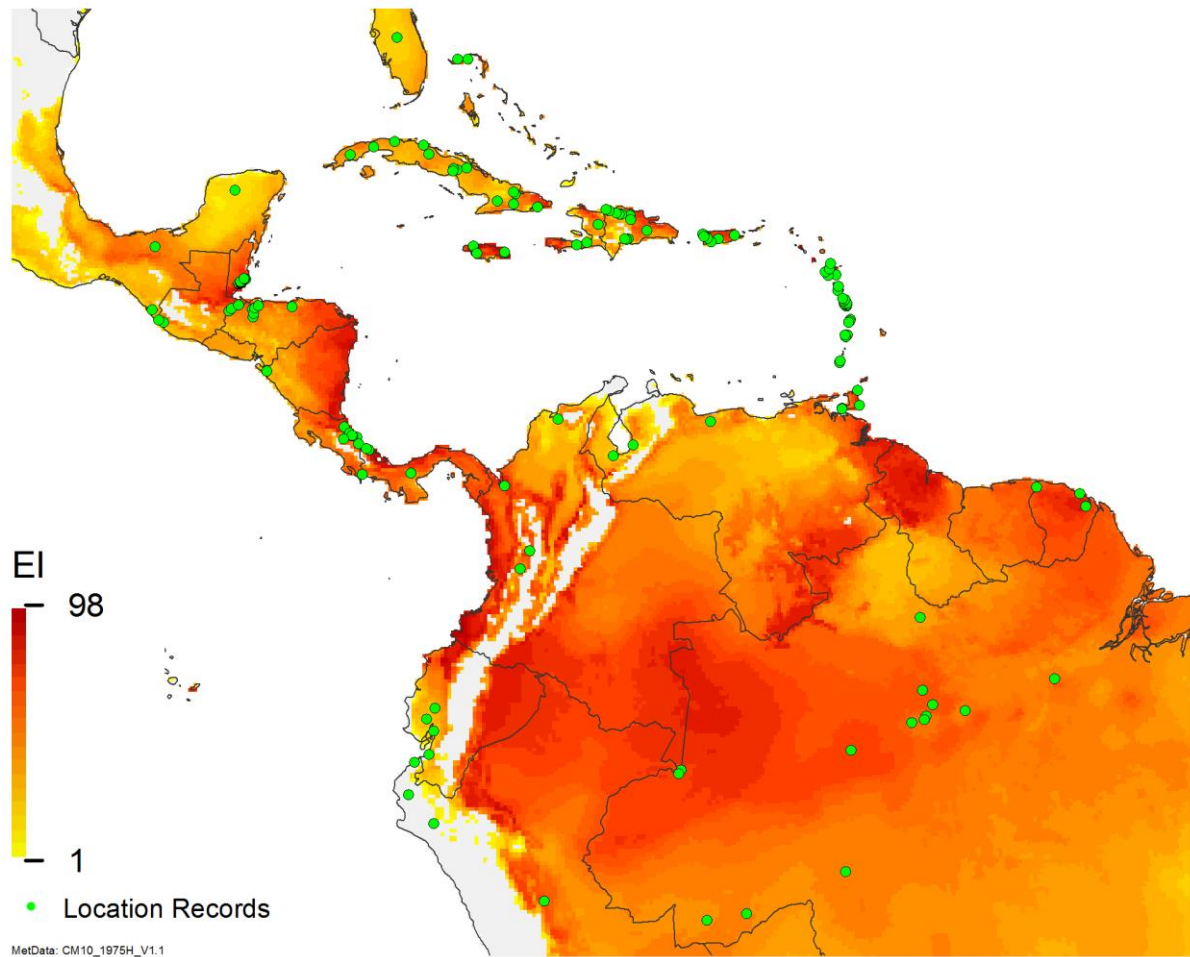

Banana production is rainfed in Costa Rica [1, 2] and Panama [2]. All location records for *P. fijiensis* in Costa Rica fall within highly suitable ( $EI > 70$ ) regions; those in Panama vary more ( $EI$  ranges from 54 to 80), although they are still all highly suitable. Although most of the rest of Central America is projected to be suitable under a natural rainfall scenario, it appears that irrigation is practiced, and so  $EI$  values for these locations increase and growth becomes temperature-limited (see Figs. S9-11).

1. Sikirica N. Water Footprint Assessment. Bananas and Pineapples. The Netherlands: Soil and More International, 2011 2011. Report No.
2. LimnoTech. Water Footprint Assessment. Banana and Lettuce Products Produced by Chiquita. Prepared for World Wildlife fund International & Chiquita Brands International. Ann Arbor, Michigan: 2012.
